# Supplementary material for: A multicenter, randomized, open-label, comparative, phase IV study to evaluate the efficacy and safety of combined treatment with mycophenolate mofetil and corticosteroids in advanced immunoglobulin A nephropathy
Source: PubMed Central journal article supplement — Kidney Res Clin Pract. 2022 May 4;41(4):452–61. doi: 10.23876/j.krcp.21.146 (PMC9346400; doi:10.23876/j.krcp.21.146), 2022-05-04
Supplement: j-krcp-21-146suppl.pdf [file j-krcp-21-146suppl.pdf]

**Supplementary Table 1. Summary of kidney biopsy findings in study participants**

| Variable              | Treatment group (n = 15) | Control group (n = 18) |
|-----------------------|--------------------------|------------------------|
| Subclass              |                          |                        |
| I                     | 0 (0)                    | 2 (11.1)               |
| II                    | 1 (6.7)                  | 0 (0)                  |
| III                   | 6 (40.0)                 | 8 (44.4)               |
| IV                    | 6 (40.0)                 | 7 (38.9)               |
| Oxford classification |                          |                        |
| M1                    | 7 (46.7)                 | 6 (33.3)               |
| E1                    | 0 (0)                    | 3 (16.7)               |
| S1                    | 5 (33.3)                 | 3 (16.7)               |
| T1                    | 4 (26.7)                 | 2 (11.1)               |
| C1                    | 2 (13.3)                 | 3 (16.7)               |

Data are expressed as number (%).

Kidney biopsy findings were available in only 33 of 48 participants. Subclass data were available in only 31 participants, and MEST-C scores were available in only 15 participants.
